# Supplementary material for: Discrimination of zone-specific spectral signatures in normal human prostate using Raman spectroscopy
Source: Royal Society of Chemistry journal article supplement (doi:10.1039/c0an00518e), 2010-01-01
Supplement: c0an00518e.pdf [file c0an00518e.pdf]

# **Discrimination of zone-specific spectral signatures in normal prostate using Raman spectroscopy**

Imran I. Patel, Francis L. Martin

*Centre for Biophotonics, Lancaster Environment  
Centre, Lancaster University, Bailrigg, Lancaster,  
UK*

**Figures = 4**

**Tables = 1**

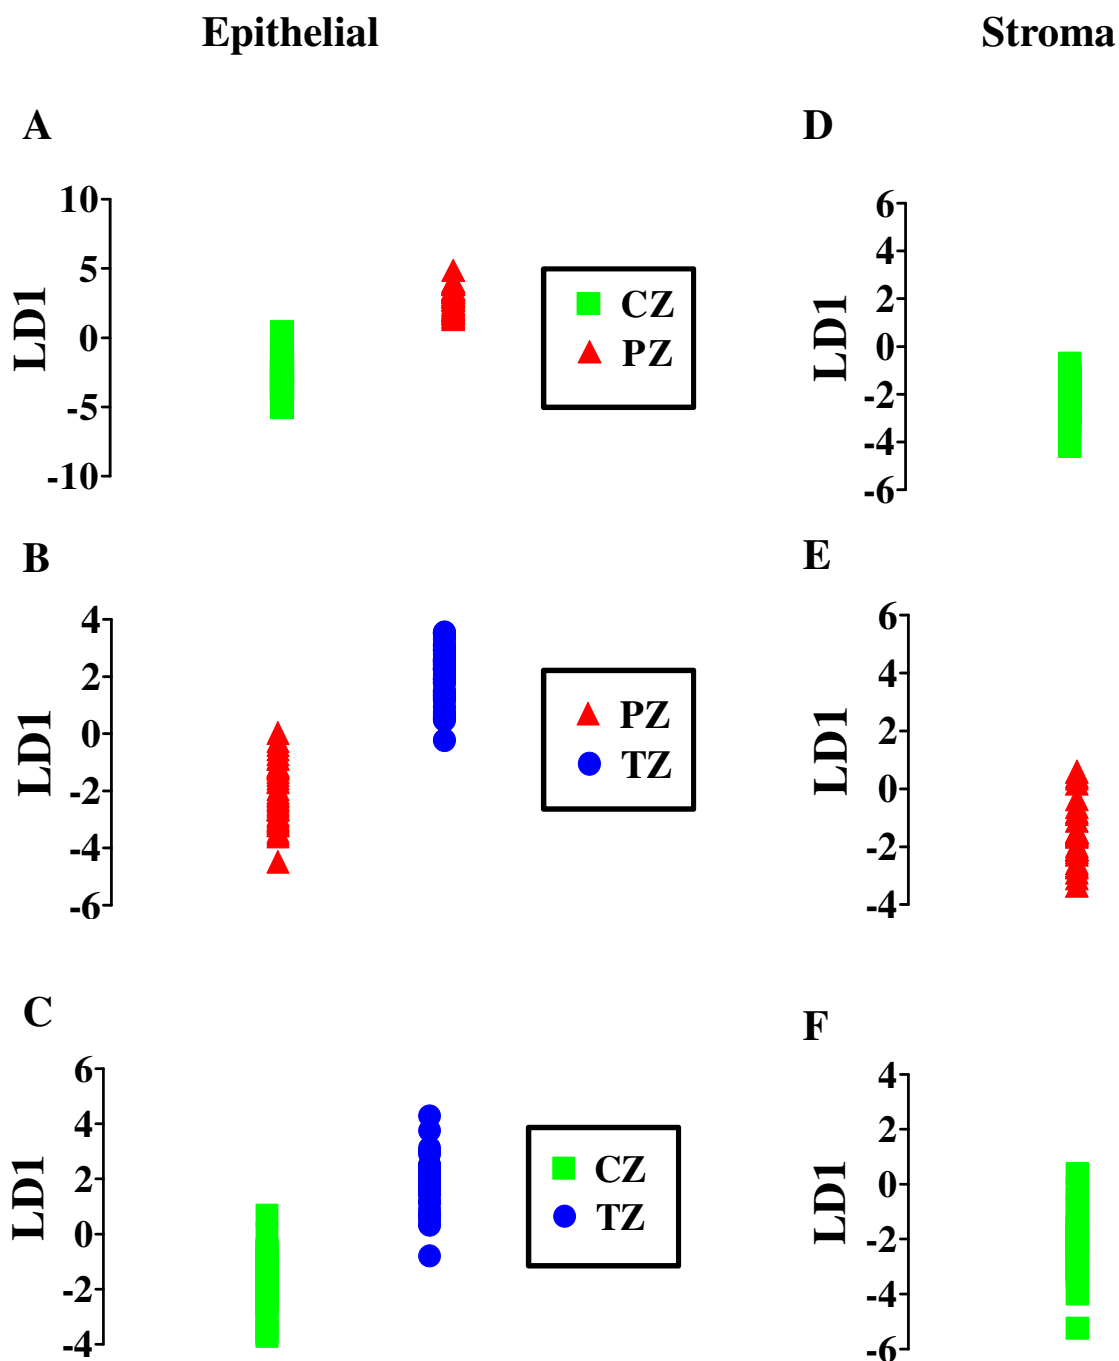

**Figure 1S.** Principal component analysis with subsequent linear discriminant analysis (PCA-LDA) of prostate epithelial-cell or stromal inter-zone comparisons. Wavenumbers associated with paraffin vibrational modes were excluded. One-D scores plots illustrating segregation between categories are displayed: PZ (red triangles), CZ (green squares), TZ (blue circles). (A) PCA-LDA scores plot of CZ vs. PZ epithelial cells; (B) PCA-LDA scores plot of PZ vs. TZ stroma (C) PCA-LDA scores plot of CZ vs. TZ epithelial cells; (D) PCA-LDA scores plot of CZ vs. PZ stroma (E) PCA-LDA scores plot of PZ vs. TZ epithelial cells; and, (F) PCA-LDA scores plot of CZ vs. TZ stroma. CZ, central zone; LD, linear discriminant; PZ, peripheral zone; TZ, transition zone

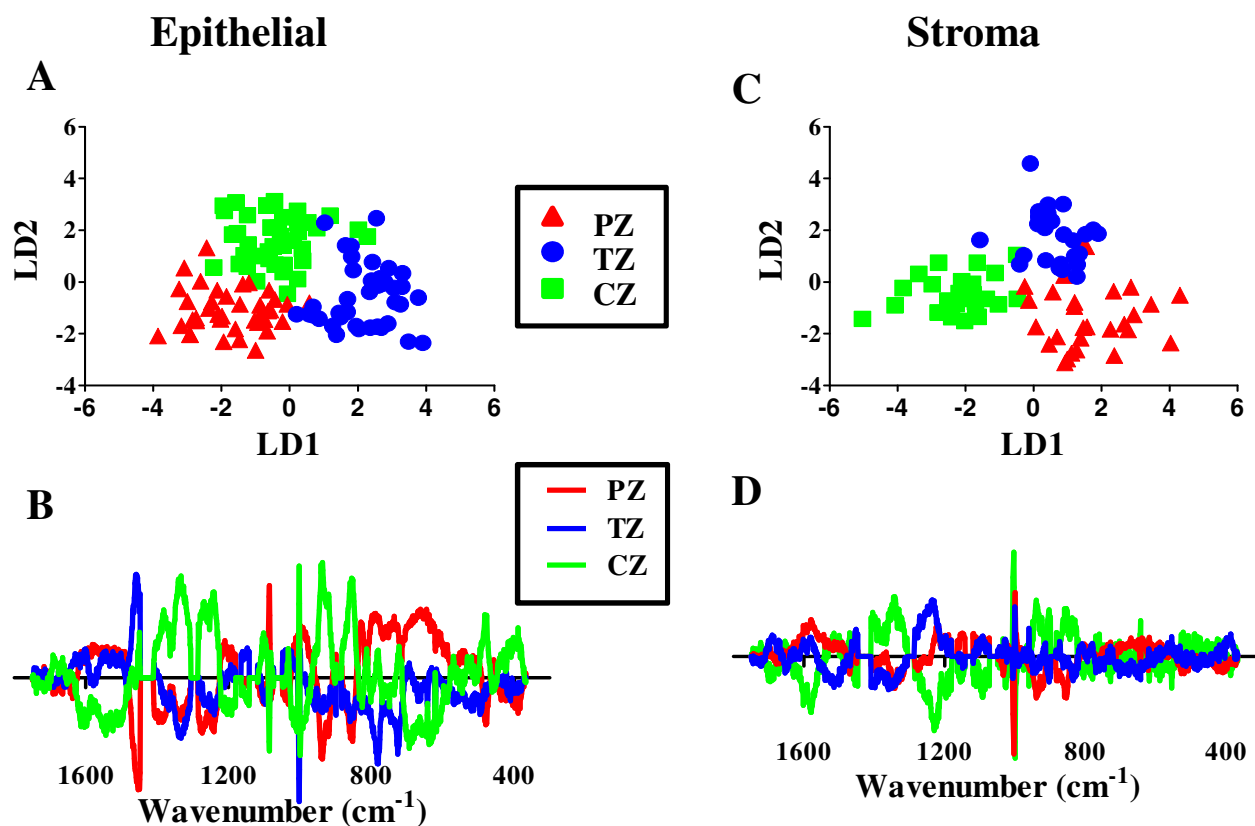

**Figure 2S.** Principal component analysis with subsequent linear discriminant analysis (PCA-LDA) of prostatic inter-zonal epithelial cells and stroma. Wavenumbers associated with paraffin vibrational modes were excluded. Two-D scores plots and corresponding cluster vectors illustrating segregation between categories are displayed: PZ (red triangles), CZ (green squares), TZ (blue circles). (A) PCA-LDA scores plot of PZ vs. CZ vs. TZ epithelial cells; (B) Cluster vectors of PZ vs. CZ vs. TZ epithelial cells; (C) PCA scores plot of PZ vs. CZ vs. TZ stroma; and, (D) Cluster vectors of PZ vs. CZ vs. TZ stroma.

CZ, central zone; PZ, peripheral zone; LD, linear discriminant; TZ, transition zone

**Table 1S.** Discriminating wavenumbers for inter-category segregation identified by PCA-LDA cluster vectors

| Tentative wavenumber (cm <sup>-1</sup> ) assignments <sup>13,18,22-24</sup>   | Inter-zone comparison |   |              |   |              |   |
|-------------------------------------------------------------------------------|-----------------------|---|--------------|---|--------------|---|
|                                                                               | PZ versus CZ          |   | PZ versus TZ |   | CZ versus TZ |   |
|                                                                               | E                     | S | E            | S | E            | S |
| -1585: lipids (C=C olefinic stretch)                                          |                       |   | X            |   |              |   |
| -1575: purine rings                                                           |                       |   | X            |   |              |   |
| -1548: tryptophan                                                             |                       |   |              | X |              |   |
| -1485: purine rings                                                           |                       |   |              |   |              |   |
| -1468                                                                         |                       | X |              |   |              |   |
| -1459: lipids and proteins (CH <sub>2</sub> deformation)                      |                       | X | X            | X | X            |   |
| -1386: CH <sub>3</sub> bend                                                   | X                     |   |              |   |              |   |
| -1369: guanine, proteins and lipids                                           |                       |   |              |   |              |   |
| -1346: collagen                                                               |                       |   |              |   |              | X |
| -1311: collagen/ lipids (CH <sub>3</sub> CH <sub>2</sub> twisting)            |                       |   |              |   |              |   |
| -1269: Amide III (α-helix)                                                    |                       |   |              | X |              |   |
| -1223: Amide III (β-helix)                                                    |                       | X |              |   |              | X |
| -1210: phenylalanine and tryptophan (C-C <sub>6</sub> H <sub>5</sub> stretch) |                       |   |              |   |              |   |
| -1150: proteins (C-C and C-N stretch)                                         |                       |   |              |   |              |   |
| -1090-1111: lipid and proteins (C-C and C-N stretch)                          |                       |   |              | X |              |   |
| -1030: phenylalanine (C-H stretch)                                            |                       | X |              | X |              |   |
| -1001: phenylalanine (symmetric ring breathing)                               |                       | X | X            | X | X            | X |
| -961                                                                          |                       |   |              |   |              | X |
| -938: protein backbone (C-C stretch)                                          | X                     | X |              |   | X            |   |
| -936: protein/ glycogen (C-C stretch)                                         |                       | X |              |   |              |   |
| -921: proline ring/ glucose (C-C stretch)                                     |                       |   |              |   | X            |   |
| -905                                                                          |                       |   | X            |   |              |   |
| -859: tyrosine/ glycogen                                                      |                       | X |              |   |              |   |
| -853: tyrosine/ proline (ring breathing/ C-C stretch)                         | X                     |   |              |   | X            | X |
| -838                                                                          |                       |   |              |   |              | X |
| -787: DNA (O-P-O stretch)                                                     | X                     |   | X            |   |              |   |
| -781: cytosine/uracil (ring breathing)                                        | X                     |   | X            |   |              |   |
| -755: tryptophan (ring breathing)                                             |                       |   |              | X |              |   |
| -727: protein (C-S stretch/ CH <sub>2</sub> rocking)                          |                       |   |              |   |              |   |
| -718: phospholipid head/ adenine (C-N stretch)                                |                       |   |              | X |              |   |
| -642: tyrosine (C-C twisting)                                                 | X                     |   |              |   | X            |   |
| -621: phenylalanine (C-C twisting)                                            | X                     |   | X            |   | X            | X |
| -525: proteins (S-S stretch)                                                  |                       |   |              |   |              | X |
| -506                                                                          |                       |   | X            |   |              |   |
| -480: starch                                                                  | X                     |   |              |   | X            |   |

X, discriminating in this inter-category comparison; E, epithelial cell; S, stroma; CZ, central zone; PZ, peripheral zone; TZ, transition zone

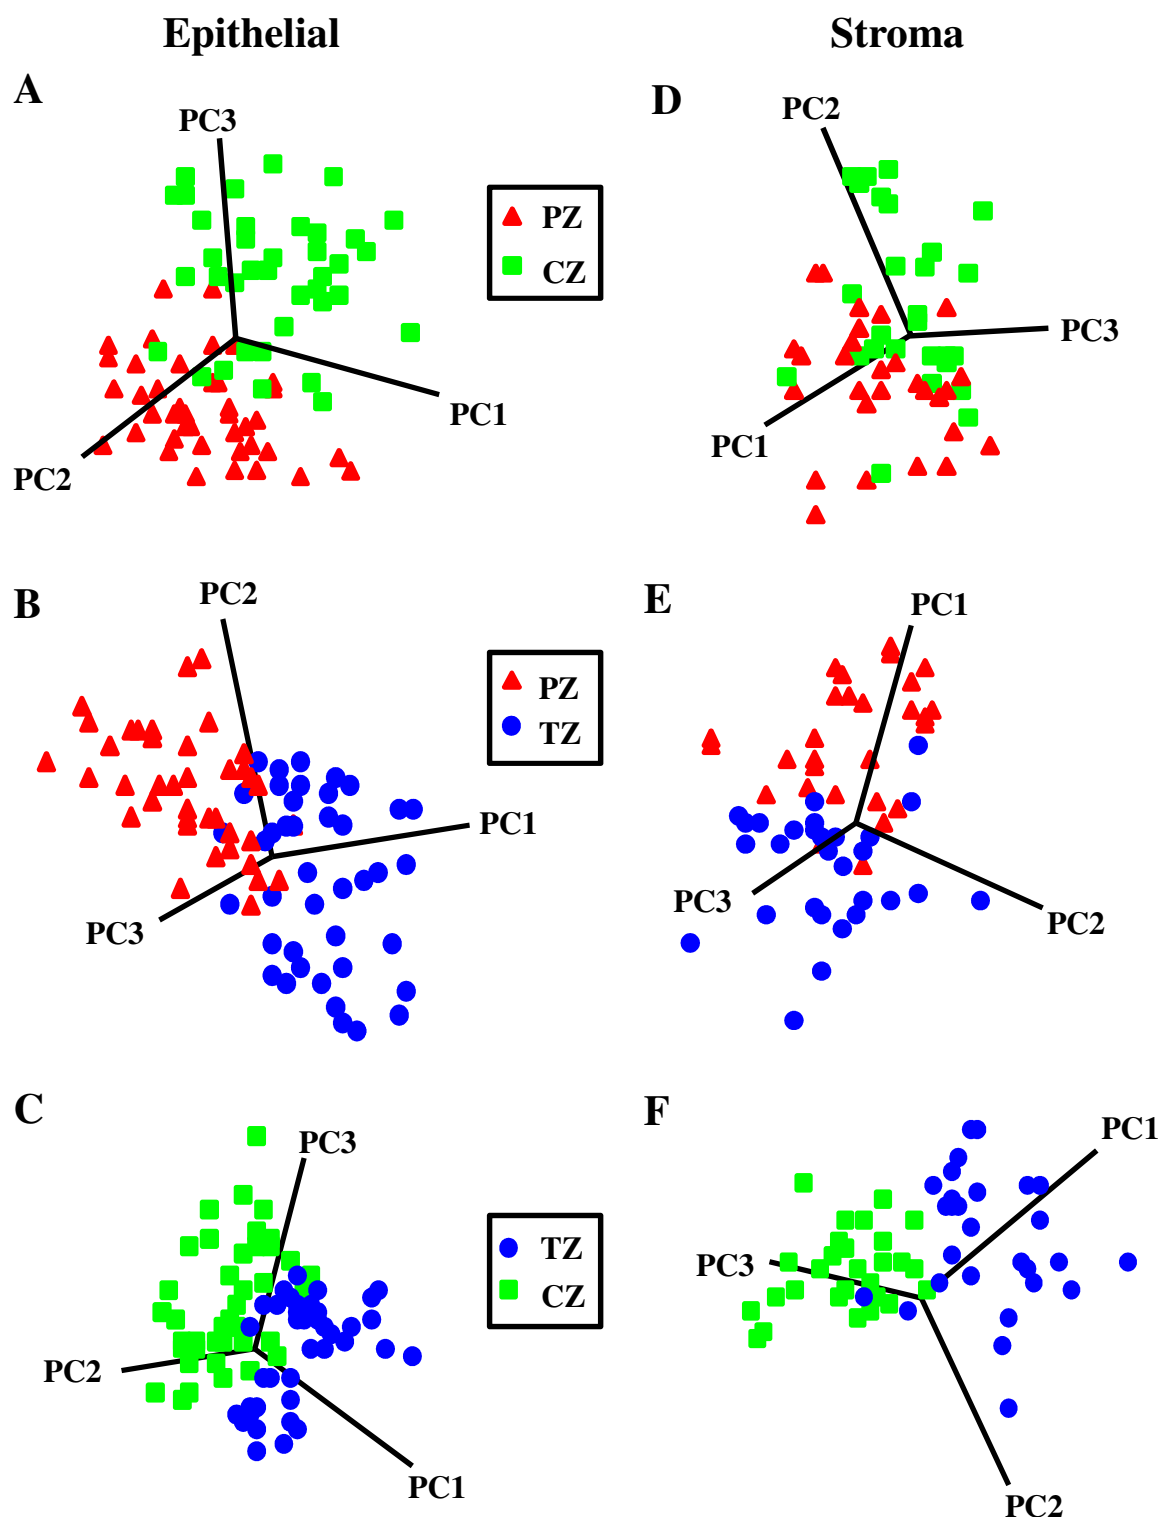

**Figure 3S.** Principal component analysis (PCA) for two-class discrimination of prostate inter zone comparisons of epithelial cells or stroma. Principal components (PCs) determining best segregation of classes are displayed: PZ (red triangles), CZ (green squares), TZ (blue circles). (A) PCA scores plot of epithelial cell PZ vs. CZ; (B) PCA scores plot of epithelial cell PZ vs. TZ; (C) PCA scores plot of epithelial cell TZ vs. CZ; (D) PCA scores plot of stromal PZ vs. CZ; (E) PCA scores plot of stromal PZ vs. TZ; and, (F) PCA scores plot of stromal TZ vs. CZ. CZ, central zone; PZ, peripheral zone; TZ, transition zone

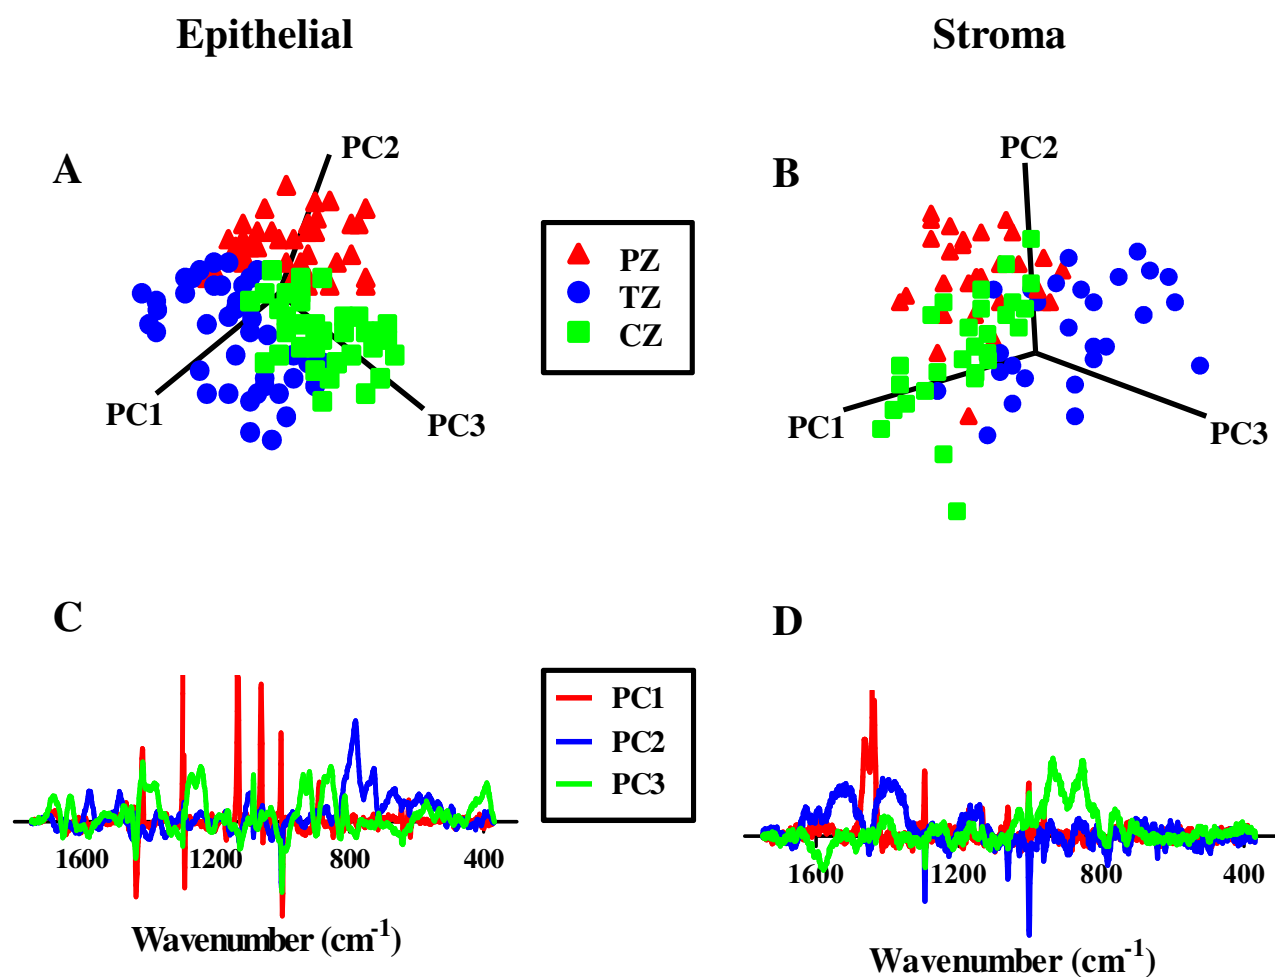

**Figure 4S.** Principal component analysis (PCA) analysis of prostate inter-zone comparisons of epithelial cells or stroma. Principal components (PCs) determining best segregation of classes are displayed: PZ (red triangles), CZ (green squares), TZ (blue circles). **(A)** PCA scores plot of PZ vs. CZ vs. TZ epithelial cells; **(B)** PCA scores plot of PZ vs. CZ vs. TZ stroma; **(C)** PCA loadings plot of PZ vs. CZ vs. TZ epithelial cells; and, **(D)** PCA loadings plot of PZ vs. CZ vs. TZ stroma. CZ, central zone; PZ, peripheral zone; TZ, transition zone
